# Supplementary material
Source: MDPI journal article supplement (https://www.mdpi.com/2071-1050/13/3/1463)
Supplement: s1 [file s1]

**Supplementary File 2: Table demonstrating theme occurrence and data saturation in analysed survey responses (response 1-610) with absence of new themes in response 610**

| Participant | Themes (n=16)                        |                                       |                                             |                       |                                            |                                    |                                        |                      |              |                        |                                               |                                           |                                   |                                         |                          |                       | Number of new themes |
|-------------|--------------------------------------|---------------------------------------|---------------------------------------------|-----------------------|--------------------------------------------|------------------------------------|----------------------------------------|----------------------|--------------|------------------------|-----------------------------------------------|-------------------------------------------|-----------------------------------|-----------------------------------------|--------------------------|-----------------------|----------------------|
|             | Understanding terminology/<br>labels | Awareness of plastic waste<br>problem | Attention to product<br>packaging/labelling | Packaging preferences | Other product qualities take<br>precedence | Access to BCPP waste<br>management | Aspects of the shopping<br>environment | Availability of BCPP | Social norms | Environmental concerns | Beliefs about environmental<br>impact of BCPP | Resolve to behave pro-<br>environmentally | Hope that BCPP will be beneficial | Scepticism over decomposition<br>claims | No intention to buy BCPP | Beliefs around agency |                      |
| 1           |                                      |                                       |                                             |                       |                                            |                                    |                                        |                      |              |                        | x                                             |                                           |                                   |                                         |                          |                       | 1                    |
| 2           |                                      |                                       |                                             |                       |                                            |                                    |                                        |                      |              |                        |                                               | x                                         |                                   |                                         |                          |                       | 1                    |
| 3           |                                      |                                       |                                             |                       |                                            |                                    |                                        |                      |              |                        | x                                             |                                           |                                   |                                         |                          |                       | 0                    |
| 4           |                                      |                                       |                                             |                       |                                            |                                    |                                        |                      |              |                        | x                                             |                                           |                                   |                                         |                          |                       | 0                    |
| 5           |                                      | x                                     |                                             |                       |                                            |                                    |                                        |                      |              |                        |                                               |                                           |                                   |                                         |                          |                       | 1                    |
| 6           |                                      |                                       |                                             |                       |                                            |                                    |                                        |                      |              |                        |                                               |                                           | x                                 |                                         |                          |                       | 1                    |
| 7           |                                      |                                       |                                             |                       |                                            | x                                  |                                        |                      |              |                        |                                               |                                           |                                   |                                         |                          |                       | 1                    |
| 8           |                                      |                                       |                                             |                       |                                            |                                    |                                        |                      |              |                        | x                                             |                                           |                                   |                                         |                          |                       | 0                    |
| 9           |                                      |                                       |                                             |                       |                                            |                                    |                                        |                      |              |                        | x                                             |                                           |                                   |                                         |                          |                       | 0                    |
| 10          |                                      |                                       |                                             |                       |                                            |                                    |                                        |                      |              |                        |                                               |                                           | x                                 |                                         |                          |                       | 0                    |
| 11          |                                      |                                       |                                             |                       |                                            |                                    |                                        |                      |              | x                      |                                               |                                           |                                   |                                         |                          |                       | 1                    |
| 12          |                                      |                                       |                                             |                       |                                            | x                                  |                                        |                      |              |                        |                                               |                                           | x                                 |                                         |                          |                       | 0                    |
| 13          |                                      |                                       |                                             |                       |                                            |                                    |                                        |                      |              |                        |                                               | x                                         |                                   |                                         |                          |                       | 0                    |
| 14          |                                      |                                       |                                             |                       |                                            |                                    |                                        |                      |              |                        | x                                             |                                           |                                   |                                         |                          |                       | 0                    |
| 15          |                                      |                                       |                                             |                       |                                            |                                    |                                        |                      |              |                        |                                               | x                                         |                                   |                                         |                          |                       | 0                    |
| 16          |                                      |                                       |                                             |                       |                                            |                                    |                                        |                      |              |                        | x                                             |                                           |                                   |                                         |                          |                       | 0                    |
| 17          |                                      |                                       |                                             |                       |                                            |                                    |                                        |                      |              |                        |                                               | x                                         |                                   |                                         |                          |                       | 0                    |
| 18          |                                      |                                       |                                             |                       |                                            |                                    |                                        |                      |              |                        | x                                             |                                           |                                   |                                         |                          |                       | 0                    |
| 19          |                                      |                                       |                                             |                       |                                            |                                    |                                        |                      |              |                        | x                                             |                                           |                                   |                                         |                          |                       | 0                    |
| 20          |                                      |                                       |                                             |                       |                                            | x                                  |                                        |                      |              |                        |                                               |                                           |                                   |                                         |                          |                       | 0                    |
| 21          |                                      |                                       |                                             |                       |                                            |                                    |                                        |                      |              |                        |                                               | x                                         |                                   |                                         |                          |                       | 0                    |
| 22          |                                      |                                       |                                             | x                     |                                            |                                    |                                        |                      |              | x                      |                                               |                                           |                                   |                                         |                          |                       | 1                    |
| 23          |                                      |                                       |                                             |                       |                                            |                                    |                                        |                      |              |                        | x                                             |                                           |                                   |                                         |                          |                       | 0                    |
| 24          |                                      |                                       |                                             |                       |                                            |                                    |                                        |                      |              |                        |                                               | x                                         |                                   |                                         |                          |                       | 0                    |
| 25          |                                      |                                       |                                             | x                     |                                            |                                    |                                        |                      |              |                        |                                               |                                           |                                   |                                         |                          |                       | 0                    |
| 26          |                                      |                                       |                                             |                       |                                            |                                    |                                        |                      |              |                        | x                                             |                                           |                                   |                                         |                          |                       | 0                    |
| 27          |                                      |                                       |                                             |                       |                                            |                                    |                                        |                      |              |                        | x                                             |                                           |                                   |                                         |                          |                       | 0                    |
| 28          |                                      |                                       |                                             |                       |                                            | x                                  |                                        |                      |              |                        |                                               | x                                         |                                   |                                         |                          |                       | 0                    |
| 29          |                                      |                                       |                                             |                       |                                            | x                                  |                                        |                      |              |                        | x                                             |                                           |                                   |                                         |                          |                       | 0                    |
| 30          |                                      |                                       |                                             |                       |                                            |                                    |                                        |                      |              |                        |                                               | x                                         |                                   |                                         |                          |                       | 0                    |
| 31          |                                      |                                       |                                             |                       |                                            |                                    |                                        |                      |              |                        |                                               |                                           | x                                 |                                         |                          |                       | 0                    |
| 32          |                                      |                                       |                                             |                       |                                            |                                    |                                        |                      |              |                        |                                               | x                                         |                                   |                                         |                          |                       | 0                    |
| 33          |                                      |                                       |                                             |                       |                                            |                                    |                                        |                      |              |                        | x                                             |                                           |                                   |                                         |                          |                       | 0                    |
| 34          |                                      |                                       |                                             |                       |                                            |                                    |                                        |                      |              |                        | x                                             |                                           |                                   |                                         |                          |                       | 0                    |
| 35          |                                      |                                       |                                             |                       |                                            |                                    |                                        |                      |              |                        |                                               | x                                         |                                   |                                         |                          |                       | 0                    |
| 36          |                                      |                                       |                                             |                       |                                            |                                    |                                        |                      |              |                        |                                               | x                                         |                                   |                                         |                          |                       | 0                    |
| 37          |                                      |                                       |                                             |                       |                                            |                                    |                                        |                      |              |                        | x                                             |                                           |                                   |                                         |                          |                       | 0                    |
| 38          |                                      | x                                     |                                             |                       |                                            |                                    |                                        |                      |              |                        |                                               | x                                         |                                   |                                         |                          |                       | 0                    |
| 39          |                                      |                                       |                                             |                       |                                            |                                    |                                        |                      |              |                        |                                               | x                                         |                                   |                                         |                          |                       | 0                    |
| 40          |                                      |                                       |                                             |                       |                                            |                                    |                                        |                      |              |                        | x                                             |                                           |                                   |                                         |                          |                       | 0                    |
| 41          |                                      |                                       |                                             |                       |                                            |                                    |                                        |                      | x            |                        |                                               |                                           |                                   |                                         |                          |                       | 1                    |
| 42          |                                      |                                       |                                             |                       |                                            |                                    |                                        |                      |              |                        |                                               | x                                         |                                   |                                         |                          |                       | 0                    |
| 43          |                                      |                                       |                                             |                       |                                            |                                    |                                        |                      |              |                        | x                                             |                                           |                                   |                                         |                          |                       | 0                    |
| 44          |                                      |                                       |                                             |                       |                                            |                                    |                                        |                      |              |                        |                                               | x                                         |                                   |                                         |                          |                       | 0                    |

|     |  |   |  |  |   |  |   |   |   |   |   |   |   |  |  |   |
|-----|--|---|--|--|---|--|---|---|---|---|---|---|---|--|--|---|
| 45  |  |   |  |  |   |  |   |   |   |   |   | x |   |  |  | 0 |
| 46  |  |   |  |  |   |  |   |   |   |   |   | x | x |  |  | 0 |
| 47  |  |   |  |  |   |  |   |   |   |   |   | x |   |  |  | 0 |
| 48  |  |   |  |  |   |  |   |   | x |   |   |   |   |  |  | 0 |
| 49  |  |   |  |  |   |  |   |   |   | x |   |   |   |  |  | 0 |
| 50  |  |   |  |  |   |  |   |   |   | x |   |   |   |  |  | 0 |
| 51  |  |   |  |  |   |  |   |   |   | x |   |   |   |  |  | 0 |
| 52  |  |   |  |  |   |  |   |   |   |   | x |   |   |  |  | 0 |
| 53  |  |   |  |  |   |  |   |   |   | x |   |   |   |  |  | 0 |
| 54  |  |   |  |  |   |  |   |   |   | x |   |   |   |  |  | 0 |
| 55  |  |   |  |  |   |  | x |   |   |   |   |   |   |  |  | 1 |
| 56  |  |   |  |  |   |  |   |   |   |   | x |   |   |  |  | 0 |
| 57  |  |   |  |  |   |  |   |   |   | x |   |   |   |  |  | 0 |
| 58  |  |   |  |  |   |  |   |   |   | x |   |   |   |  |  | 0 |
| 59  |  |   |  |  | x |  |   |   |   |   | x |   |   |  |  | 0 |
| 60  |  |   |  |  |   |  |   |   |   |   |   | x |   |  |  | 0 |
| 61  |  |   |  |  |   |  |   |   |   | x |   |   |   |  |  | 0 |
| 62  |  | x |  |  |   |  |   |   |   |   | x |   |   |  |  | 0 |
| 63  |  |   |  |  |   |  |   |   |   |   | x |   |   |  |  | 0 |
| 64  |  |   |  |  |   |  |   |   |   | x |   |   |   |  |  | 0 |
| 65  |  |   |  |  |   |  |   |   |   | x |   |   |   |  |  | 0 |
| 66  |  |   |  |  |   |  |   |   |   | x |   |   |   |  |  | 0 |
| 67  |  |   |  |  |   |  |   |   |   | x |   |   |   |  |  | 0 |
| 68  |  |   |  |  |   |  |   |   |   | x |   |   |   |  |  | 0 |
| 69  |  |   |  |  |   |  |   |   |   |   |   | x |   |  |  | 0 |
| 70  |  |   |  |  |   |  |   |   |   |   | x |   |   |  |  | 0 |
| 71  |  |   |  |  |   |  |   |   |   |   | x |   |   |  |  | 0 |
| 72  |  |   |  |  |   |  |   |   |   | x |   |   |   |  |  | 0 |
| 73  |  |   |  |  |   |  |   |   |   |   | x |   |   |  |  | 0 |
| 74  |  |   |  |  |   |  |   |   |   | x | x |   |   |  |  | 0 |
| 75  |  |   |  |  |   |  |   | x |   |   |   |   |   |  |  | 0 |
| 76  |  |   |  |  |   |  |   |   |   | x | x |   |   |  |  | 0 |
| 77  |  |   |  |  |   |  |   |   |   | x |   |   |   |  |  | 0 |
| 78  |  |   |  |  |   |  |   |   | x |   |   |   |   |  |  | 0 |
| 79  |  |   |  |  | x |  |   |   |   |   |   |   |   |  |  | 0 |
| 80  |  |   |  |  |   |  |   |   |   | x |   |   |   |  |  | 0 |
| 81  |  |   |  |  |   |  |   |   |   | x |   |   |   |  |  | 0 |
| 82  |  |   |  |  |   |  |   |   |   | x |   |   |   |  |  | 0 |
| 83  |  |   |  |  |   |  |   |   |   | x |   |   |   |  |  | 0 |
| 84  |  |   |  |  |   |  |   |   |   |   | x |   |   |  |  | 0 |
| 85  |  |   |  |  |   |  |   |   |   | x |   |   |   |  |  | 0 |
| 86  |  |   |  |  |   |  |   |   |   | x |   |   |   |  |  | 0 |
| 87  |  |   |  |  |   |  |   |   | x |   |   |   |   |  |  | 0 |
| 88  |  |   |  |  |   |  |   |   |   | x |   |   |   |  |  | 0 |
| 89  |  |   |  |  | x |  |   |   |   | x |   |   |   |  |  | 0 |
| 90  |  |   |  |  |   |  |   |   |   | x |   |   |   |  |  | 0 |
| 91  |  |   |  |  |   |  |   |   |   |   | x |   |   |  |  | 0 |
| 92  |  |   |  |  |   |  |   |   |   |   | x |   |   |  |  | 0 |
| 93  |  |   |  |  |   |  |   |   |   |   | x |   |   |  |  | 0 |
| 94  |  |   |  |  |   |  |   |   |   | x |   |   |   |  |  | 0 |
| 95  |  |   |  |  |   |  |   |   |   | x |   |   |   |  |  | 0 |
| 96  |  |   |  |  |   |  |   |   |   |   | x |   |   |  |  | 0 |
| 97  |  |   |  |  |   |  |   |   |   | x |   |   |   |  |  | 0 |
| 98  |  |   |  |  | x |  |   |   |   |   |   |   |   |  |  | 0 |
| 99  |  |   |  |  |   |  |   |   |   | x |   |   |   |  |  | 0 |
| 100 |  |   |  |  |   |  |   |   |   |   |   | x |   |  |  | 0 |

|     |   |   |  |   |   |   |  |  |   |   |   |   |  |  |  |   |
|-----|---|---|--|---|---|---|--|--|---|---|---|---|--|--|--|---|
| 101 |   |   |  |   |   |   |  |  |   |   | x |   |  |  |  | 0 |
| 102 |   |   |  |   |   |   |  |  |   | x |   |   |  |  |  | 0 |
| 103 |   |   |  |   |   |   |  |  |   |   | x |   |  |  |  | 0 |
| 104 |   |   |  |   |   | x |  |  |   |   | x |   |  |  |  | 0 |
| 105 |   |   |  |   |   | x |  |  |   |   |   |   |  |  |  | 0 |
| 106 |   |   |  |   |   |   |  |  |   |   |   | x |  |  |  | 0 |
| 107 |   |   |  |   |   |   |  |  |   |   |   | x |  |  |  | 0 |
| 108 |   |   |  |   |   |   |  |  |   |   |   | x |  |  |  | 0 |
| 109 |   |   |  | x |   |   |  |  |   | x |   |   |  |  |  | 0 |
| 110 |   | x |  |   |   |   |  |  |   |   |   | x |  |  |  | 0 |
| 111 |   |   |  |   |   | x |  |  |   |   |   |   |  |  |  | 0 |
| 112 |   |   |  |   |   |   |  |  |   |   | x |   |  |  |  | 0 |
| 113 |   |   |  |   |   |   |  |  |   |   |   | x |  |  |  | 0 |
| 114 |   |   |  |   |   |   |  |  |   |   |   | x |  |  |  | 0 |
| 115 |   |   |  |   |   | x |  |  |   |   |   |   |  |  |  | 0 |
| 116 |   |   |  |   |   |   |  |  |   |   | x |   |  |  |  | 0 |
| 117 |   |   |  |   |   |   |  |  |   |   |   | x |  |  |  | 0 |
| 118 |   |   |  |   |   |   |  |  |   |   |   | x |  |  |  | 0 |
| 119 |   |   |  |   |   |   |  |  |   |   |   | x |  |  |  | 0 |
| 120 |   |   |  | x |   |   |  |  |   |   |   |   |  |  |  | 0 |
| 121 |   |   |  | x |   |   |  |  |   |   |   |   |  |  |  | 0 |
| 122 |   |   |  |   |   |   |  |  |   | x |   |   |  |  |  | 0 |
| 123 |   |   |  |   |   | x |  |  |   |   | x |   |  |  |  | 0 |
| 124 |   |   |  |   |   | x |  |  |   |   |   | x |  |  |  | 0 |
| 125 |   |   |  |   |   |   |  |  |   |   |   | x |  |  |  | 0 |
| 126 | x |   |  |   | x |   |  |  |   |   |   |   |  |  |  | 1 |
| 127 |   |   |  |   |   |   |  |  |   |   |   | x |  |  |  | 0 |
| 128 |   |   |  |   |   |   |  |  |   |   |   | x |  |  |  | 0 |
| 129 |   |   |  |   |   |   |  |  |   | x |   |   |  |  |  | 0 |
| 130 |   |   |  |   |   |   |  |  |   |   |   | x |  |  |  | 0 |
| 131 |   |   |  |   |   |   |  |  |   |   | x |   |  |  |  | 0 |
| 132 |   |   |  |   |   |   |  |  |   |   | x |   |  |  |  | 0 |
| 133 |   |   |  |   |   |   |  |  |   |   |   | x |  |  |  | 0 |
| 134 |   |   |  |   |   |   |  |  |   |   |   | x |  |  |  | 0 |
| 135 |   |   |  |   |   |   |  |  |   | x |   |   |  |  |  | 0 |
| 136 |   |   |  |   |   |   |  |  |   | x |   | x |  |  |  | 0 |
| 137 |   |   |  |   |   |   |  |  |   | x |   | x |  |  |  | 0 |
| 138 |   |   |  |   |   |   |  |  | x |   |   |   |  |  |  | 0 |
| 139 |   |   |  |   |   |   |  |  |   | x |   |   |  |  |  | 0 |
| 140 |   |   |  |   |   |   |  |  |   |   |   | x |  |  |  | 0 |
| 141 |   |   |  |   |   |   |  |  |   |   |   | x |  |  |  | 0 |
| 142 |   |   |  |   |   |   |  |  |   | x |   |   |  |  |  | 0 |
| 143 |   |   |  |   |   |   |  |  |   |   | x |   |  |  |  | 0 |
| 144 |   |   |  |   |   |   |  |  |   |   | x |   |  |  |  | 0 |
| 145 |   |   |  |   |   |   |  |  |   |   | x |   |  |  |  | 0 |
| 146 |   |   |  |   |   |   |  |  |   |   | x |   |  |  |  | 0 |
| 147 |   |   |  |   |   |   |  |  |   |   |   | x |  |  |  | 0 |
| 148 |   |   |  |   |   | x |  |  |   |   |   |   |  |  |  | 0 |
| 149 |   |   |  |   |   |   |  |  |   |   | x | x |  |  |  | 0 |
| 150 |   |   |  |   |   |   |  |  |   |   | x |   |  |  |  | 0 |
| 151 |   |   |  |   |   | x |  |  |   |   |   |   |  |  |  | 0 |
| 152 |   |   |  |   |   |   |  |  |   |   |   | x |  |  |  | 0 |
| 153 |   |   |  |   |   |   |  |  |   |   |   | x |  |  |  | 0 |
| 154 |   |   |  |   |   |   |  |  |   |   | x |   |  |  |  | 0 |
| 155 |   |   |  |   |   |   |  |  |   |   | x |   |  |  |  | 0 |
| 156 |   |   |  |   |   |   |  |  |   |   | x |   |  |  |  | 0 |

[illegible]

|     |   |  |   |   |   |   |   |   |  |  |   |  |  |   |   |   |
|-----|---|--|---|---|---|---|---|---|--|--|---|--|--|---|---|---|
| 213 |   |  |   |   |   |   |   |   |  |  | x |  |  |   |   | 0 |
| 214 |   |  |   |   |   |   |   |   |  |  |   |  |  | x |   | 0 |
| 215 |   |  |   |   |   |   |   |   |  |  |   |  |  | x |   | 0 |
| 216 |   |  |   |   |   | x |   |   |  |  |   |  |  |   |   | 0 |
| 217 |   |  |   |   |   |   |   |   |  |  | x |  |  |   |   | 0 |
| 218 | x |  |   |   |   |   |   |   |  |  |   |  |  |   |   | 0 |
| 219 |   |  |   | x |   |   |   |   |  |  |   |  |  |   |   | 0 |
| 220 |   |  |   |   | x |   |   |   |  |  |   |  |  |   |   | 0 |
| 221 |   |  |   |   |   |   |   | x |  |  |   |  |  |   |   | 0 |
| 222 | x |  |   |   |   |   |   |   |  |  |   |  |  |   |   | 0 |
| 223 |   |  |   |   |   |   |   |   |  |  |   |  |  | x |   | 0 |
| 224 |   |  | x |   |   |   |   |   |  |  |   |  |  |   |   | 0 |
| 225 |   |  |   |   |   |   |   |   |  |  | x |  |  |   |   | 0 |
| 226 |   |  |   |   |   |   |   |   |  |  |   |  |  | x |   | 0 |
| 227 |   |  |   |   |   | x |   |   |  |  |   |  |  |   |   | 0 |
| 228 |   |  |   |   |   | x |   |   |  |  | x |  |  |   |   | 0 |
| 229 |   |  |   |   |   | x |   |   |  |  |   |  |  | x |   | 0 |
| 230 |   |  |   |   |   |   |   |   |  |  |   |  |  |   | x | 0 |
| 231 | x |  |   |   |   | x |   |   |  |  |   |  |  |   |   | 0 |
| 232 |   |  | x |   |   |   |   |   |  |  |   |  |  |   | x | 0 |
| 233 |   |  |   | x |   |   |   |   |  |  | x |  |  |   |   | 0 |
| 234 |   |  |   | x |   |   |   |   |  |  |   |  |  | x |   | 0 |
| 235 |   |  |   |   |   |   |   |   |  |  |   |  |  | x |   | 0 |
| 236 |   |  |   |   |   |   |   |   |  |  |   |  |  | x | x | 0 |
| 237 |   |  | x |   |   |   |   | x |  |  |   |  |  |   |   | 0 |
| 238 |   |  | x |   |   |   |   | x |  |  |   |  |  |   |   | 0 |
| 239 |   |  |   |   |   |   | x |   |  |  |   |  |  |   |   | 0 |
| 240 |   |  |   |   |   | x |   |   |  |  |   |  |  | x |   | 0 |
| 241 |   |  |   |   |   | x |   |   |  |  |   |  |  |   |   | 0 |
| 242 | x |  |   |   |   |   |   |   |  |  |   |  |  |   |   | 0 |
| 243 |   |  | x |   |   |   |   |   |  |  |   |  |  |   |   | 0 |
| 244 |   |  |   |   |   |   |   |   |  |  |   |  |  | x |   | 0 |
| 245 |   |  |   |   | x |   |   |   |  |  |   |  |  |   |   | 0 |
| 246 |   |  |   |   |   |   |   |   |  |  | x |  |  |   |   | 0 |
| 247 |   |  |   |   | x |   |   |   |  |  |   |  |  |   |   | 0 |
| 248 |   |  |   |   |   |   |   |   |  |  | x |  |  | x |   | 0 |
| 249 |   |  | x |   |   |   |   |   |  |  |   |  |  |   |   | 0 |
| 250 |   |  |   | x |   |   |   |   |  |  |   |  |  |   |   | 0 |
| 251 |   |  |   |   | x |   |   |   |  |  |   |  |  |   |   | 0 |
| 252 |   |  |   |   | x |   |   |   |  |  |   |  |  |   | x | 0 |
| 253 |   |  |   | x |   | x |   |   |  |  |   |  |  | x |   | 0 |
| 254 |   |  |   |   |   |   |   |   |  |  |   |  |  | x | x | 0 |
| 255 |   |  |   |   | x |   |   |   |  |  |   |  |  |   |   | 0 |
| 256 |   |  |   |   |   |   |   |   |  |  |   |  |  | x |   | 0 |
| 257 |   |  |   |   | x |   |   |   |  |  |   |  |  |   |   | 0 |
| 258 |   |  |   |   |   |   |   |   |  |  | x |  |  | x |   | 0 |
| 259 |   |  |   |   | x |   |   |   |  |  |   |  |  |   |   | 0 |
| 260 | x |  |   |   |   |   |   | x |  |  |   |  |  |   |   | 0 |
| 261 |   |  |   |   |   |   |   | x |  |  | x |  |  |   |   | 0 |
| 262 |   |  |   |   | x |   |   |   |  |  |   |  |  |   |   | 0 |
| 263 |   |  | x |   |   |   |   |   |  |  |   |  |  |   | x | 0 |
| 264 |   |  | x |   | x |   |   |   |  |  |   |  |  |   |   | 0 |
| 265 |   |  |   |   |   |   |   |   |  |  |   |  |  |   | x | 0 |
| 266 |   |  |   |   |   | x |   |   |  |  | x |  |  | x |   | 0 |
| 267 |   |  |   |   |   |   |   |   |  |  |   |  |  | x |   | 0 |
| 268 |   |  |   |   |   |   |   |   |  |  |   |  |  | x |   | 0 |

[illegible]

[illegible]

|     |   |  |   |   |   |   |  |   |  |   |  |  |  |   |   |   |
|-----|---|--|---|---|---|---|--|---|--|---|--|--|--|---|---|---|
| 381 |   |  |   |   |   | x |  |   |  |   |  |  |  |   |   | 0 |
| 382 |   |  |   | x |   |   |  |   |  |   |  |  |  |   |   | 0 |
| 383 | x |  |   | x |   |   |  | x |  |   |  |  |  |   |   | 0 |
| 384 |   |  |   |   |   |   |  |   |  | x |  |  |  | x |   | 0 |
| 385 |   |  |   |   |   | x |  |   |  |   |  |  |  | x |   | 0 |
| 386 |   |  |   | x |   |   |  |   |  |   |  |  |  |   | x | 0 |
| 387 |   |  |   |   |   |   |  |   |  | x |  |  |  |   | x | 0 |
| 388 |   |  |   |   |   |   |  |   |  | x |  |  |  |   |   | 0 |
| 389 |   |  |   |   |   |   |  |   |  |   |  |  |  | x |   | 0 |
| 390 |   |  |   | x |   |   |  |   |  |   |  |  |  |   |   | 0 |
| 391 |   |  |   |   |   |   |  |   |  |   |  |  |  |   | x | 0 |
| 392 |   |  |   |   |   |   |  |   |  |   |  |  |  | x |   | 0 |
| 393 |   |  |   |   |   | x |  |   |  |   |  |  |  |   |   | 0 |
| 394 |   |  |   |   |   |   |  |   |  |   |  |  |  | x |   | 0 |
| 395 | x |  |   |   |   |   |  |   |  |   |  |  |  |   |   | 0 |
| 396 |   |  |   |   |   |   |  |   |  |   |  |  |  | x |   | 0 |
| 397 |   |  | x |   |   |   |  |   |  |   |  |  |  |   |   | 0 |
| 398 |   |  |   |   |   |   |  |   |  | x |  |  |  |   |   | 0 |
| 399 |   |  |   |   |   | x |  |   |  |   |  |  |  |   |   | 0 |
| 400 |   |  | x |   |   |   |  |   |  |   |  |  |  |   |   | 0 |
| 401 |   |  |   |   |   | x |  |   |  |   |  |  |  |   |   | 0 |
| 402 | x |  |   |   |   |   |  |   |  |   |  |  |  |   |   | 0 |
| 403 | x |  |   |   |   |   |  |   |  |   |  |  |  |   |   | 0 |
| 404 |   |  |   |   | x |   |  |   |  |   |  |  |  |   |   | 0 |
| 405 |   |  |   |   |   |   |  |   |  | x |  |  |  |   |   | 0 |
| 406 |   |  |   |   | x |   |  | x |  |   |  |  |  | x |   | 0 |
| 407 | x |  |   |   |   |   |  |   |  |   |  |  |  |   |   | 0 |
| 408 |   |  |   | x |   |   |  |   |  |   |  |  |  |   |   | 0 |
| 409 |   |  | x | x |   |   |  |   |  |   |  |  |  |   | x | 0 |
| 410 |   |  |   |   |   |   |  |   |  |   |  |  |  | x |   | 0 |
| 411 |   |  |   |   |   |   |  |   |  |   |  |  |  | x |   | 0 |
| 412 |   |  |   | x | x |   |  |   |  |   |  |  |  |   |   | 0 |
| 413 |   |  | x |   |   |   |  |   |  |   |  |  |  |   |   | 0 |
| 414 | x |  |   |   |   |   |  |   |  |   |  |  |  |   |   | 0 |
| 415 |   |  |   | x |   |   |  |   |  |   |  |  |  |   | x | 0 |
| 416 |   |  |   |   |   |   |  |   |  |   |  |  |  | x |   | 0 |
| 417 | x |  |   | x |   |   |  |   |  |   |  |  |  |   | x | 0 |
| 418 |   |  |   | x |   |   |  |   |  |   |  |  |  |   |   | 0 |
| 419 |   |  |   | x |   |   |  |   |  |   |  |  |  |   |   | 0 |
| 420 |   |  |   | x |   |   |  |   |  |   |  |  |  |   |   | 0 |
| 421 |   |  |   | x |   |   |  |   |  |   |  |  |  | x |   | 0 |
| 422 |   |  |   |   | x |   |  |   |  |   |  |  |  |   |   | 0 |
| 423 |   |  |   |   |   |   |  | x |  |   |  |  |  |   |   | 0 |
| 424 |   |  |   |   |   |   |  |   |  |   |  |  |  | x |   | 0 |
| 425 |   |  |   |   |   |   |  |   |  |   |  |  |  | x |   | 0 |
| 426 |   |  |   |   |   |   |  | x |  |   |  |  |  |   |   | 0 |
| 427 |   |  |   | x |   |   |  |   |  |   |  |  |  |   |   | 0 |
| 428 |   |  | x | x |   |   |  |   |  |   |  |  |  |   |   | 0 |
| 429 | x |  |   |   |   |   |  |   |  |   |  |  |  |   |   | 0 |
| 430 |   |  |   |   |   |   |  |   |  |   |  |  |  | x |   | 0 |
| 431 |   |  |   | x | x |   |  |   |  |   |  |  |  |   |   | 0 |
| 432 |   |  | x | x |   |   |  |   |  |   |  |  |  |   |   | 0 |
| 433 |   |  |   |   |   |   |  |   |  |   |  |  |  | x |   | 0 |
| 434 |   |  |   |   | x |   |  |   |  |   |  |  |  |   |   | 0 |
| 435 |   |  | x |   |   |   |  |   |  |   |  |  |  |   |   | 0 |
| 436 |   |  |   |   |   |   |  |   |  | x |  |  |  |   | x | 0 |



|     |   |  |   |   |   |  |   |   |  |  |   |   |  |   |   |   |
|-----|---|--|---|---|---|--|---|---|--|--|---|---|--|---|---|---|
| 437 |   |  |   |   |   |  |   | x |  |  |   |   |  |   |   | 0 |
| 438 |   |  |   |   |   |  |   |   |  |  |   |   |  | x |   | 0 |
| 439 |   |  |   |   |   |  |   |   |  |  |   |   |  | x |   | 0 |
| 440 |   |  |   |   |   |  |   | x |  |  |   |   |  |   |   | 0 |
| 441 |   |  |   |   |   |  |   |   |  |  |   |   |  | x |   | 0 |
| 442 |   |  | x |   |   |  |   |   |  |  |   |   |  |   |   | 0 |
| 443 |   |  |   |   |   |  | x |   |  |  |   |   |  |   |   | 0 |
| 444 |   |  |   |   |   |  |   | x |  |  |   |   |  |   |   | 0 |
| 445 | x |  |   |   |   |  |   |   |  |  |   |   |  |   |   | 0 |
| 446 |   |  |   |   | x |  |   |   |  |  |   |   |  |   |   | 0 |
| 447 |   |  | x |   |   |  |   |   |  |  |   |   |  |   |   | 0 |
| 448 | x |  |   |   |   |  |   |   |  |  |   |   |  | x |   | 0 |
| 449 |   |  |   |   |   |  |   |   |  |  |   |   |  | x |   | 0 |
| 450 |   |  |   |   |   |  |   |   |  |  |   |   |  |   | x | 0 |
| 451 |   |  |   |   | x |  |   |   |  |  |   |   |  |   |   | 0 |
| 452 | x |  |   |   |   |  |   |   |  |  |   |   |  |   |   | 0 |
| 453 |   |  |   |   |   |  |   | x |  |  |   |   |  |   | x | 0 |
| 454 |   |  |   | x |   |  |   | x |  |  |   |   |  |   |   | 0 |
| 455 |   |  | x |   |   |  |   |   |  |  |   |   |  |   |   | 0 |
| 456 |   |  |   |   |   |  |   |   |  |  |   |   |  |   | x | 0 |
| 457 |   |  |   | x |   |  |   |   |  |  |   |   |  | x |   | 0 |
| 458 | x |  |   |   |   |  |   |   |  |  |   |   |  |   |   | 0 |
| 459 |   |  | x |   |   |  |   |   |  |  |   |   |  |   |   | 0 |
| 460 |   |  |   |   |   |  |   |   |  |  |   |   |  | x |   | 0 |
| 461 | x |  |   |   |   |  |   |   |  |  |   |   |  |   |   | 0 |
| 462 |   |  |   |   |   |  |   |   |  |  |   |   |  | x |   | 0 |
| 463 |   |  |   | x |   |  |   |   |  |  |   |   |  | x |   | 0 |
| 464 |   |  |   |   |   |  |   | x |  |  |   |   |  |   |   | 0 |
| 465 |   |  | x |   |   |  |   |   |  |  |   |   |  |   |   | 0 |
| 466 |   |  | x |   |   |  |   |   |  |  |   |   |  |   |   | 0 |
| 467 |   |  |   |   |   |  |   | x |  |  |   |   |  |   |   | 0 |
| 468 |   |  |   |   |   |  |   |   |  |  |   |   |  | x |   | 0 |
| 469 |   |  |   | x |   |  |   |   |  |  |   |   |  |   |   | 0 |
| 470 |   |  |   |   |   |  |   |   |  |  |   |   |  | x |   | 0 |
| 471 |   |  |   | x |   |  |   |   |  |  |   |   |  |   |   | 0 |
| 472 |   |  |   | x |   |  |   |   |  |  |   |   |  |   |   | 0 |
| 473 | x |  |   |   |   |  |   |   |  |  |   |   |  |   |   | 0 |
| 474 |   |  | x |   |   |  |   |   |  |  |   |   |  |   |   | 0 |
| 475 |   |  |   |   |   |  |   |   |  |  |   |   |  | x |   | 0 |
| 476 |   |  |   |   | x |  |   |   |  |  |   |   |  |   |   | 0 |
| 477 |   |  |   |   | x |  |   |   |  |  |   |   |  |   |   | 0 |
| 478 |   |  | x |   |   |  |   |   |  |  |   |   |  |   |   | 0 |
| 479 |   |  | x | x |   |  |   |   |  |  |   |   |  |   |   | 0 |
| 480 | x |  |   |   |   |  |   |   |  |  |   |   |  | x |   | 0 |
| 481 |   |  |   |   | x |  |   |   |  |  |   |   |  |   |   | 0 |
| 482 |   |  | x |   |   |  |   |   |  |  |   |   |  |   |   | 0 |
| 483 |   |  | x |   |   |  |   |   |  |  |   |   |  |   |   | 0 |
| 484 |   |  |   |   |   |  |   |   |  |  |   |   |  |   | x | 0 |
| 485 |   |  | x |   | x |  |   |   |  |  |   |   |  |   |   | 0 |
| 486 |   |  |   | x |   |  |   |   |  |  |   |   |  |   |   | 0 |
| 487 |   |  |   |   |   |  |   | x |  |  |   |   |  |   |   | 0 |
| 488 |   |  |   |   | x |  |   |   |  |  |   |   |  |   |   | 0 |
| 489 |   |  |   |   |   |  |   |   |  |  |   | x |  |   |   | 0 |
| 490 | x |  |   |   |   |  |   |   |  |  |   |   |  |   |   | 0 |
| 491 | x |  |   |   |   |  |   |   |  |  |   |   |  |   |   | 0 |
| 492 |   |  |   |   |   |  |   |   |  |  | x |   |  |   |   | 0 |

[illegible]

[illegible]

|       |    |   |    |    |    |    |    |    |   |    |     |    |   |     |    |   |   |
|-------|----|---|----|----|----|----|----|----|---|----|-----|----|---|-----|----|---|---|
| 605   | x  |   |    |    |    |    |    |    |   |    |     |    |   | x   |    |   | 0 |
| 606   | x  |   |    |    |    |    |    |    |   |    |     |    |   |     |    |   | 0 |
| 607   | x  |   |    |    |    |    |    |    |   |    |     |    |   |     |    |   | 0 |
| 608   |    |   |    |    |    |    |    |    |   |    | x   |    |   |     |    |   | 0 |
| 609   |    |   | x  |    |    |    |    |    |   |    |     |    |   |     |    |   | 0 |
| 610   |    |   |    |    | x  |    |    |    |   |    |     |    |   |     |    |   | 0 |
| TOTAL | 61 | 4 | 55 | 71 | 71 | 64 | 14 | 27 | 2 | 20 | 112 | 74 | 9 | 112 | 33 | 4 |   |
